# Supplementary material
Source: MDPI journal article supplement (https://www.mdpi.com/2078-2489/8/4/137)
Supplement: s1 [file s1]

%==Ref1
@inproceedings{schollmeier2001definition,
  title="A definition of peer-to-peer networking for the classification of peer-to-peer architectures and applications",
  author="Schollmeier, R{\"u}diger",
  booktitle="Peer-to-Peer Computing, 2001. Proceedings. First International Conference on",
  pages="101--102",
  year="2001",
  organization="IEEE"
}

%==Ref2
@inproceedings{ripeanu2001peer,
  title="Peer-to-peer architecture case study: Gnutella network",
  author="Ripeanu, Matei",
  booktitle="Peer-to-Peer Computing, 2001. Proceedings. First International Conference on",
  pages="99--100",
  year="2001",
  organization="IEEE"
}

%==Ref3
@article{iacovou1995electronic,
  title="Electronic data interchange and small organizations: Adoption and impact of technology",
  author="Iacovou, Charalambos L and Benbasat, Izak and Dexter, Albert S",
  journal="MIS quarterly",
  pages="465--485",
  year="1995",
  publisher="JSTOR"
}

%==Ref4
@inproceedings{pezoa2016foundations,
  title="Foundations of JSON schema",
  author="Pezoa, Felipe and Reutter, Juan L and Suarez, Fernando and Ugarte, Mart{\'\i}n and Vrgo{\v{c}}, Domagoj",
  booktitle="Proceedings of the 25th International Conference on World Wide Web",
  pages="263--273",
  year="2016",
  organization="International World Wide Web Conferences Steering Committee"
}

%==Ref5
@inproceedings{andrade2005influences,
  title="Influences on cooperation in bittorrent communities",
  author="Andrade, Nazareno and Mowbray, Miranda and Lima, Aliandro and Wagner, Gustavo and Ripeanu, Matei",
  booktitle="Proceedings of the 2005 ACM SIGCOMM workshop on Economics of peer-to-peer systems",
  pages="111--115",
  year="2005",
  organization="ACM"
}

%==Ref6
@book{parfett1992edi,
  title="What is EDI?: a guide to electronic data interchange",
  author="Parfett, Martin",
  year="1992",
  publisher="Blackwell Pub"
}

%==Ref7
@techreport{ibm2017next,
  title="Next Generation Supply Chain powered by Cognitive and Blockchain",
  author="IBM Institute for Business Value, *",
  year="2017",
  institution={Digital Supply Chain}
}

%==Ref8
@techreport{Smith2016Blockfreight,
  title="Blockfreight: Blockchain Technology for Global Freight",
  author="Smith, Julian",
  year="2016",
  institution="Online: https://bravenewcoin.com/assets/Whitepapers/BlockfreightWhitepaperFinalDraft.pdf"
}

%==Ref9
@misc{nakamoto2012bitcoin,
  title="Bitcoin: A peer-to-peer electronic cash system, 2008",
  author="Nakamoto, Satoshi",
  year="2012"
}

%==Ref10
@article{fox2001peer,
  title="Peer-to-peer networks",
  author="Fox, Geoffrey",
  journal="Computing in Science \& Engineering",
  volume="3",
  number="3",
  pages="75--77",
  year="2001",
  publisher="IEEE"
}

%==Ref11
@techreport{guha2005experimental,
  title="An experimental study of the skype peer-to-peer voip system",
  author="Guha, Saikat and Daswani, Neil",
  year="2005",
  institution="Cornell University"
}

%==Ref12
@inproceedings{li2017integration,
  title="On the Integration of Event-Based and Transaction-Based Architectures for Supply Chains",
  author="Li, Zhijie and Wu, Haoyan and King, Brian and Ben Miled, Zina and Wassick, John and Tazelaar, Jeffrey",
  booktitle="Distributed Computing Systems Workshops (ICDCSW), 2017 IEEE 37th International Conference on",
  pages="376--382",
  year="2017",
  organization="IEEE"
}

%==Ref13
@article{pilkington2015blockchain,
  title="Blockchain technology: principles and applications",
  author="Pilkington, Marc",
  journal="Research Handbook on Digital Transformations",
  year="2015"
}

%==Ref14
@article{pike2009go,
  title="The go programming language",
  author="Pike, Rob",
  journal="Talk given at Google’s Tech Talks",
  year="2009"
}

%==Ref15
@inproceedings{wei2011using,
  title="Using MongoDB to implement textbook management system instead of MySQL",
  author="Wei-ping, Zhu and Ming-Xin, LI and Huan, Chen",
  booktitle="Communication Software and Networks (ICCSN), 2011 IEEE 3rd International Conference",
  pages="303--305",
  year="2011",
  organization="IEEE"
}

%==Ref16
@book{harrison2008logistics,
  title={Logistics management and strategy},
  author={Harrison, Alan and van Hoek, Remko I},
  year={2008},
  publisher={Pearson Education}
}

%==Ref17
@techreport{Beck2011Supply,
  title="Supply chain segmentation: the next step in supply chain excellence",
  author="Beck, Rich",
  year="2011",
  institution="Online: http://info.e2open.com/rs/e2open/images/WP\_SC\_Segmentation.pdf"
}

%==Ref18
@book{dickersbach2005supply,
  title="Supply Chain Management with APO: Structures, Modelling Approaches and Implementation of MySAP SCM 4.1",
  author="Dickersbach, J{\"o}rg Thomas",
  year="2005",
  publisher="Springer Science \& Business Media"
}

%==Ref19
@article{yli2016current,
  title="Where Is Current Research on Blockchain Technology?—A Systematic Review",
  author="Yli-Huumo, Jesse and Ko, Deokyoon and Choi, Sujin and Park, Sooyong and Smolander, Kari",
  journal="PloS one",
  volume="11",
  number="10",
  pages="e0163477",
  year="2016",
  publisher="Public Library of Science"
}

%==Ref20
@book{daithankar2014transportation,
  title="Transportation Management with SAP TM 9: A Hands-on Guide to Configuring, Implementing, and Optimizing SAP TM",
  author="Daithankar, Jayant and Pandit, Tejkumar",
  year="2014",
  publisher="Apress"
}

%==Ref21
@article{kumar2017coordination,
  title="Coordination and responsiveness issues in SME supply chains: a review",
  author="Kumar, Ravinder and Kumar, Ravinder and Kumar Singh, Rajesh and Kumar Singh, Rajesh",
  journal="Benchmarking: An International Journal",
  volume="24",
  number="3",
  pages="635--650",
  year="2017",
  publisher={Emerald Publishing Limited}
}

%==Ref22
@article{rezaei2015smes,
  title="How SMEs can benefit from supply chain partnerships",
  author="Rezaei, Jafar and Ortt, Roland and Trott, Paul",
  journal="International Journal of Production Research",
  volume="53",
  number="5",
  pages="1527--1543",
  year="2015",
  publisher="Taylor \& Francis"
}

%==Ref23
@article{qureshi2013survey,
  title="A survey on intelligent transportation systems",
  author="Qureshi, Kashif Naseer and Abdullah, Abdul Hanan",
  journal="Middle-East Journal of Scientific Research",
  volume="15",
  number="5",
  pages="629--642",
  year="2013"
}

%==Ref24
@article{xia2017bbds,
  title="BBDS: Blockchain-Based Data Sharing for Electronic Medical Records in Cloud Environments",
  author="Xia, Qi and Sifah, Emmanuel Boateng and Smahi, Abla and Amofa, Sandro and Zhang, Xiaosong",
  journal="Information",
  volume="8",
  number="2",
  pages="44",
  year="2017",
  publisher="Multidisciplinary Digital Publishing Institute"
}

%==Ref25
@article{zheng2016blockchain,
  title="Blockchain Challenges and Opportunities: A Survey",
  author="Zheng, Zibin and Xie, Shaoan and Dai, Hong-Ning and Wang, Huaimin",
  journal="Work Pap",
  year="2016"
}

%==Ref26
@article{toyoda2017novel,
  title="A Novel Blockchain-Based Product Ownership Management System (POMS) for Anti-Counterfeits in The Post Supply Chain",
  author="Toyoda, Kentaroh and Mathiopoulos, P Takis and Sasase, Iwao and Ohtsuki, Tomoaki",
  journal="IEEE Access",
  year="2017",
  publisher="IEEE"
}

%==Ref27
@inproceedings{nakasumi2017information,
  title="Information Sharing for Supply Chain Management Based on Block Chain Technology",
  author="Nakasumi, Mitsuaki",
  booktitle="Business Informatics (CBI), 2017 IEEE 19th Conference on",
  volume="1",
  pages="140--149",
  year="2017",
  organization="IEEE"
}

%==Ref28
@inproceedings{korpela2017digital,
  title="Digital Supply Chain Transformation toward Blockchain Integration",
  author="Korpela, Kari and Hallikas, Jukka and Dahlberg, Tomi",
  booktitle="Proceedings of the 50th Hawaii International Conference on System Sciences",
  year="2017"
}

%==Ref29
@article{zhao2016overview,
  title="Overview of business innovations and research opportunities in blockchain and introduction to the special issue",
  author="Zhao, J Leon and Fan, Shaokun and Yan, Jiaqi",
  journal="Financial Innovation",
  volume="2",
  number="1",
  pages="28",
  year="2016",
  publisher="Springer Berlin Heidelberg"
}

%==Ref30
@inproceedings{zyskind2015decentralizing,
  title="Decentralizing privacy: Using blockchain to protect personal data",
  author="Zyskind, Guy and Nathan, Oz and others",
  booktitle="Security and Privacy Workshops (SPW), 2015 IEEE",
  pages="180--184",
  year="2015",
  organization="IEEE"
}

%==Ref31
@inproceedings{xu2017taxonomy,
  title="A Taxonomy of Blockchain-Based Systems for Architecture Design",
  author="Xu, Xiwei and Weber, Ingo and Staples, Mark and Zhu, Liming and Bosch, Jan and Bass, Len and Pautasso, Cesare and Rimba, Paul",
  booktitle="Software Architecture (ICSA), 2017 IEEE International Conference on",
  pages="243--252",
  year="2017",
  organization="IEEE"
}

%==Ref32
@inproceedings{lundbaek2017oligarchic,
  title="Oligarchic Control of Business-to-Business Blockchains",
  author="Lundbaek, Leif-Nissen and Huth, Michael",
  booktitle="Security and Privacy Workshops (EuroS\&PW), 2017 IEEE European Symposium on",
  pages="68--71",
  year="2017",
  organization="IEEE"
}

%==Ref33
@article{kshetri2017can,
  title="Can Blockchain Strengthen the Internet of Things?",
  author="Kshetri, Nir",
  journal="IT Professional",
  volume="19",
  number="4",
  pages="68--72",
  year="2017",
  publisher="IEEE"
}

%==Ref34
@inproceedings{bocek2017blockchains,
  title="Blockchains everywhere-a use-case of blockchains in the pharma supply-chain",
  author="Bocek, Thomas and Rodrigues, Bruno B and Strasser, Tim and Stiller, Burkhard",
  booktitle="Integrated Network and Service Management (IM), 2017 IFIP/IEEE Symposium on",
  pages="772--777",
  year="2017",
  organization="IEEE"
}

%==Ref35
@inproceedings{tian2016agri,
  title="An agri-food supply chain traceability system for China based on RFID \& blockchain technology",
  author="Tian, Feng",
  booktitle="Service Systems and Service Management (ICSSSM), 2016 13th International Conference on",
  pages="1--6",
  year="2016",
  organization="IEEE"
}
